# Supplementary material for: The Binding Ability of Mercury (Hg) to Photosystem I and II Explained the Difference in Its Toxicity on the Two Photosystems of Chlorella pyrenoidosa
Source: MDPI journal article supplement (doi:10.3390/toxics10080455), 2022-08-06
Supplement: s1 [file s1]

# Supplementary Materials: The Binding Ability of Mercury (Hg) to Photosystem I and II Explained the Difference in Its Toxicity on the Two Photosystems of *Chlorella pyrenoidosa*

Shuzhi Wang, Jia Duo, Rehemanjiang Wufuer, Wenfeng Li and Xiangliang Pan

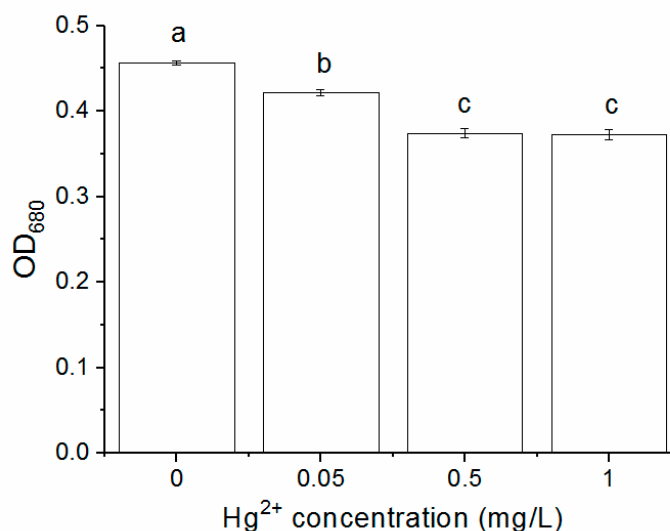

**Figure S1.** Cell growth of *Chlorella pyrenoidosa* at various Hg concentrations expressed as the optical density at 680 nm (OD<sub>680</sub>). Cells were cultured in BG-11 medium with various concentrations of Hg<sup>2+</sup> for 24 h. Data are means ± S.E. (n = 3). Significant differences between different treatments were shown as different letters ( $p < 0.05$ , ANOVA, Duncan's test).

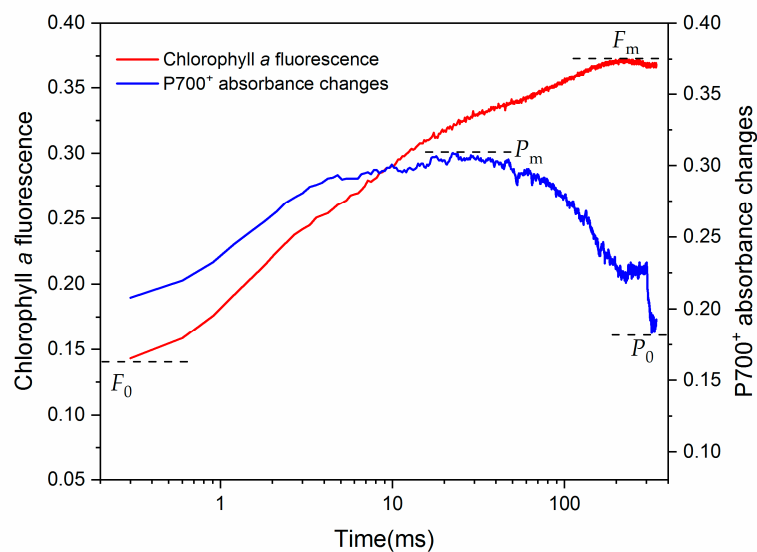

**Figure S2.** A typical experimental result obtained with Dual-PAM-100. The sample was dark-adapted for 5 min before measurement. P700<sup>+</sup> absorbance changes and chlorophyll *a* fluorescence were detected through the application of saturation pulse. The minimal fluorescence after dark-adaptation ( $F_0$ ), the maximum fluorescence ( $F_m$ ), and the maximal change in P700<sup>+</sup> signal ( $P_m$ ) were determined through application of saturation pulse. The P700<sup>+</sup> absorbance changes were detected by the application saturation pulse after far-red pre-illumination to determine  $P_m$ . After the saturation pulse the minimal P700<sup>+</sup> signal ( $P_0$ ) was measured.

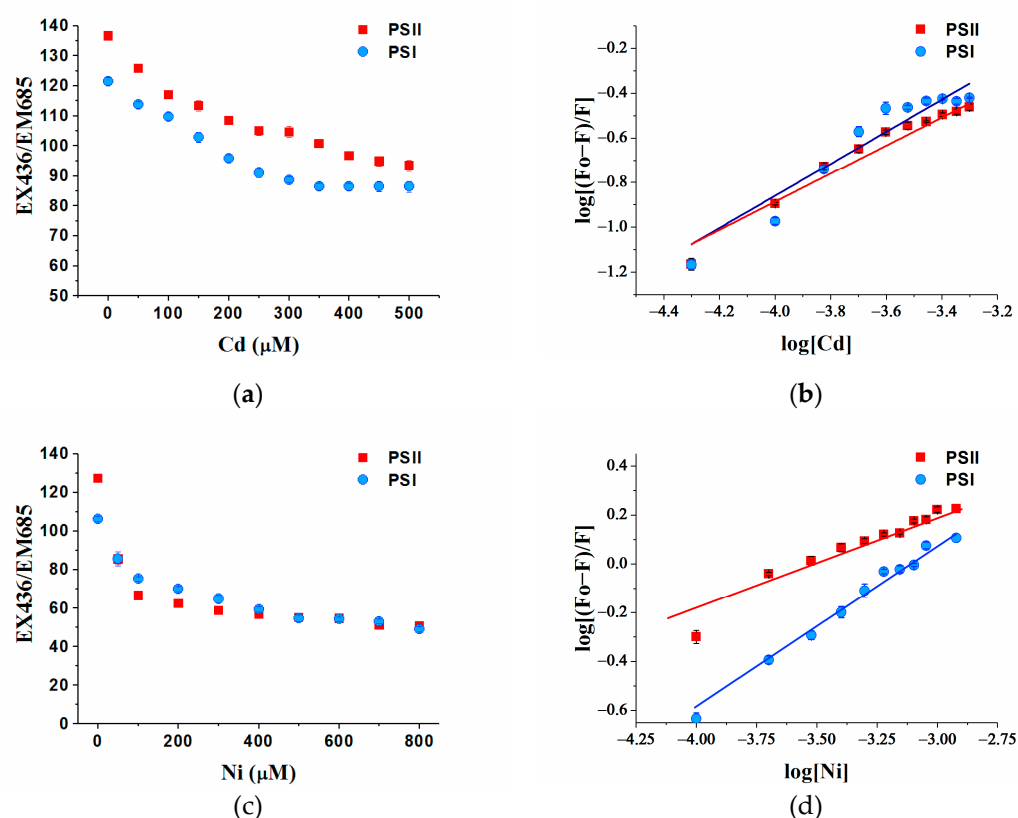

**Figure S3.** Quenching effects of Cd and Ni on fluorescence of photosystems particles isolated from *C. pyrenoidosa*. (a and c) The fluorescence intensity of photosystems at EX436/EM685 and the quenching of the fluorescence with Cd or Ni ions. (b and d) The equilibrium characteristics of binding process by fitting of the fluorescence curves. Data are means  $\pm$  S.E. ( $n = 3$ ).

**Table S1.** Fitting parameters of quenching curves of the fluorescence of photosystems particles by titration of heavy metals.

| Heavy metal | PSI particles                          |                 | PSII particles                         |                 |
|-------------|----------------------------------------|-----------------|----------------------------------------|-----------------|
|             | Ka<br>( $\times 10^4 \text{ M}^{-1}$ ) | n               | Ka<br>( $\times 10^4 \text{ M}^{-1}$ ) | n               |
| Hg          | $2.68 \pm 0.19$                        | $0.69 \pm 0.09$ | $2.72 \pm 0.12$                        | $0.79 \pm 0.07$ |
| Cd          | $2.12 \pm 0.16$                        | $0.57 \pm 0.08$ | $1.97 \pm 0.07$                        | $0.78 \pm 0.05$ |
| Ni          | $2.09 \pm 0.13$                        | $0.46 \pm 0.06$ | $1.26 \pm 0.09$                        | $0.37 \pm 0.04$ |

Note: Data are means  $\pm$  S.E. ( $n = 3$ ).
